# Supplementary material
Source: HighWire-hosted journal article supplement (https://www.canjsurg.ca/highwire/filestream/99249/field_highwire_adjunct_files/0/CJS-003823-at-1.pdf)

**Appendix 1** to Huang Y, Senger J-LB, Korus L, et al. Geographic variation in breast reconstruction surgery after mastectomy for females with breast cancer in Alberta, Canada. *Can J Surg* 2024. Copyright © 2024 The Author(s) or their employer(s).  
 To receive this resource in an accessible format, please contact us at [cmajgroup@cmaj.ca](mailto:cmajgroup@cmaj.ca).

DOI: 10.1503/cjs003823

*Online appendices are unedited and posted as supplied by the authors.*

Supplementary Table 1: Sub-Regional Health Authority (sRHA) identification numbers (IDs) and names.

| ID | sRHA Name                             | ID | sRHA Name                       |
|----|---------------------------------------|----|---------------------------------|
| 1  | R101 Crowsnest Pincher Creek          | 36 | R501 Region 5 Northwest         |
| 2  | R102 Ft McLeod Cardston               | 37 | R502 Regions 5 Northeast        |
| 3  | R103 Lethbridge                       | 38 | R503 Region 5 Southeast         |
| 4  | R104 Picture Butte Raymond Milk River | 39 | R504 Region 5 South Central     |
| 5  | R105 Vauxhall Taber                   | 40 | R505 Region5 Southwest          |
| 6  | R201 Palliser North and Central       | 41 | R601 St. Albert                 |
| 7  | R202 Palliser West                    | 42 | R602 Edmonton Castle Downs      |
| 8  | R301 Calgary North East               | 43 | R603 Edmonton Woodcroft         |
| 9  | R302 Calgary Beddington Heights       | 44 | R604 Edmonton Eastwood          |
| 10 | R303 Calgary Northwest                | 45 | R605 Edmonton North Central     |
| 11 | R304 Calgary University               | 46 | R606 Edmonton North East        |
| 12 | R305 Calgary Charleswood              | 47 | R607 Edmonton Bonnie Doon       |
| 13 | R306 Calgary Marlborough              | 48 | R608 Edmonton West Jasper Place |
| 14 | R307 Calgary Shaganappi               | 49 | R609 Edmonton Twin Brooks       |
| 15 | R308 Calgary Bowness                  | 50 | R612 Edmonton Mill Woods        |
| 16 | R309 Calgary Scarboro                 | 51 | R613 Sherwood Park              |
| 17 | R310 Calgary Forest Lawn              | 52 | R614 Strathcona County          |
| 18 | R311 Calgary Lakeview                 | 53 | R615 Thorsby                    |
| 19 | R312 Calgary Mount Royal              | 54 | R616 Leduc Office               |
| 20 | R313 Calgary Haysboro                 | 55 | R617 Beaumont                   |
| 21 | R314 Calgary Bonavista                | 56 | R618 Westview                   |
| 22 | R315 Calgary South                    | 57 | R619 Sturgeon County            |
| 23 | R320 Banff-Canmore                    | 58 | R620 Fort Saskatchewan          |
| 24 | R321 Didsbury-Strathmore              | 59 | R701 Aspen West                 |
| 25 | R322 Vulcan-Claresholm                | 60 | R702 Aspen Central              |
| 26 | R323 High River-Black Diamond         | 61 | R703 Aspen North                |
| 27 | R401 Clearwater                       | 62 | R704 Aspen East                 |
| 28 | R402 Brazeau                          | 63 | R801 Peace NW                   |
| 29 | R403 Wetaskiwin-Hobbema               | 64 | R802 Peace NE                   |
| 30 | R404 Ponoka                           | 65 | R803 Peace SE                   |
| 31 | R405 Lacombe                          | 66 | R804 Peace SW                   |
| 32 | R406 Red Deer                         | 67 | R901 High Level                 |
| 33 | R407 Olds                             | 68 | R902 La Crete                   |
| 34 | R408 Drumheller-Hanna                 | 69 | R903 Northern Lights Northwest  |
| 35 | R409 Stettler-Consort                 | 70 | R904 Fort McMurray              |

**Appendix 1** to Huang Y, Senger J-LB, Korus L, et al. Geographic variation in breast reconstruction surgery after mastectomy for females with breast cancer in Alberta, Canada. *Can J Surg* 2024. Copyright © 2024 The Author(s) or their employer(s).  
To receive this resource in an accessible format, please contact us at [cmajgroup@cmaj.ca](mailto:cmajgroup@cmaj.ca).

DOI: 10.1503/cjs003823

*Online appendices are unedited and posted as supplied by the authors.*

Supplementary Table 2: Population counts (women with mastectomies), cases (women with breast reconstruction surgery at 1 year) and age group directly standardized rates (DSRs) per 1,000 by year and zone.

| Fiscal Year | All            | North         | Edmonton      | Central       | Calgary        | South         |
|-------------|----------------|---------------|---------------|---------------|----------------|---------------|
| 2004        |                |               |               |               |                |               |
| Cases/Pop   | 150/1,120      | 5/89          | 28/345        | 16/177        | 86/392         | 15/117        |
| DSR         | 133.9          | 55.2          | 88.8          | 97.7          | 204.5          | 146.2         |
| (95% CI)    | (113.3, 157.2) | (17.9, 130.7) | (58.7, 129.4) | (55.7, 159.6) | (163.3, 253.6) | (80.7, 248.5) |
| 2005        |                |               |               |               |                |               |
| Cases/Pop   | 141/1,075      | 9/106         | 28/332        | 14/173        | 81/387         | 9/77          |
| DSR         | 127.8          | 88.3          | 87.2          | 95.2          | 168.2          | 119.4         |
| (95% CI)    | (107.5, 150.9) | (39.7, 174.8) | (57.6, 128.3) | (51.3, 163.7) | (132.5, 212.3) | (53.9, 238.9) |
| 2006        |                |               |               |               |                |               |
| Cases/Pop   | 103/1,077      | 3/112         | 26/330        | 9/164         | 58/366         | 7/105         |
| DSR         | 95.7           | 25.0          | 84.8          | 64.2          | 141.8          | 60.6          |
| (95% CI)    | (78.1, 116.3)  | (5.2, 75.8)   | (55.0, 126.2) | (28.3, 129.8) | (107.4, 184.7) | (24.3, 127.8) |
| 2007        |                |               |               |               |                |               |
| Cases/Pop   | 111/1,136      | 6/118         | 29/323        | 13/173        | 53/413         | 10/109        |
| DSR         | 94.7           | 47.5          | 89.4          | 75.8          | 113.6          | 119.0         |
| (95% CI)    | (77.9, 114.2)  | (17.2, 108.5) | (59.7, 129.1) | (39.8, 135.1) | (84.8, 150.3)  | (56.0, 225.2) |
| 2008        |                |               |               |               |                |               |
| Cases/Pop   | 89/1,113       | 10/118        | 22/321        | 10/171        | 42/404         | 5/99          |
| DSR         | 79.1           | 78.3          | 70.0          | 57.0          | 95.3           | 59.6          |
| (95% CI)    | (63.5, 97.7)   | (36.9, 152.9) | (43.8, 106.9) | (27.2, 109.1) | (68.4, 130.0)  | (18.7, 145.7) |
| 2009        |                |               |               |               |                |               |
| Cases/Pop   | 73/1,201       | 7/123         | 18/397        | 7/170         | 32/418         | 9/93          |
| DSR         | 59.8           | 56.1          | 44.9          | 45.3          | 71.5           | 106.3         |
| (95% CI)    | (46.9, 75.3)   | (22.1, 121.6) | (26.6, 71.0)  | (18.1, 96.5)  | (48.7, 101.9)  | (46.8, 216.8) |
| 2010        |                |               |               |               |                |               |
| Cases/Pop   | 97/1,245       | 8/113         | 27/407        | 18/198        | 35/412         | 9/155         |
| DSR         | 74.6           | 72.4          | 65.9          | 88.3          | 72.2           | 103.0         |
| (95% CI)    | (60.4, 91.3)   | (30.7, 149.4) | (43.2, 96.8)  | (51.4, 144.8) | (50.3, 102.2)  | (40.2, 233.4) |

**Appendix 1** to Huang Y, Senger J-LB, Korus L, et al. Geographic variation in breast reconstruction surgery after mastectomy for females with breast cancer in Alberta, Canada. *Can J Surg* 2024. Copyright © 2024 The Author(s) or their employer(s).  
 To receive this resource in an accessible format, please contact us at [cmajgroup@cmaj.ca](mailto:cmajgroup@cmaj.ca).

DOI: 10.1503/cjs003823

*Online appendices are unedited and posted as supplied by the authors.*

|           |                |               |                |               |                |               |
|-----------|----------------|---------------|----------------|---------------|----------------|---------------|
| 2011      |                |               |                |               |                |               |
| Cases/Pop | 71/1,195       | 5/116         | 24/366         | 8/191         | 25/393         | 9/129         |
| DSR       | 58.4           | 49.0          | 61.6           | 44.5          | 58.1           | 78.8          |
| (95% CI)  | (45.6, 73.8)   | (15.8, 116.4) | (39.4, 92.4)   | (19.1, 89.4)  | (37.5, 87.1)   | (34.4, 166.7) |
| 2012      |                |               |                |               |                |               |
| Cases/Pop | 121/1,143      | 4/86          | 34/381         | 8/160         | 63/394         | 12/122        |
| DSR       | 101.9          | 39.0          | 86.0           | 60.6          | 145.3          | 119.2         |
| (95% CI)  | (84.5, 121.9)  | (10.4, 112.1) | (59.5, 120.6)  | (23.9, 134.6) | (111.3, 187.4) | (61.0, 214.8) |
| 2013      |                |               |                |               |                |               |
| Cases/Pop | 146/1,104      | 6/99          | 29/355         | 15/133        | 92/418         | 4/99          |
| DSR       | 131.6          | 54.9          | 81.8           | 125.4         | 196.3          | 41.2          |
| (95% CI)  | (111.0, 155.2) | (19.0, 134.1) | (54.3, 119.9)  | (69.3, 211.9) | (157.8, 242.4) | (11.2, 217.7) |
| 2014      |                |               |                |               |                |               |
| Cases/Pop | 209/1,259      | 11/122        | 43/365         | 20/184        | 126/499        | 9/89          |
| DSR       | 157.2          | 82.8          | 113.7          | 126.1         | 221.2          | 103.8         |
| (95% CI)  | (136.6, 180.2) | (41.0, 154.1) | (82.1, 153.8)  | (75.9, 199.0) | (183.6, 265.2) | (47.3, 200.1) |
| 2015      |                |               |                |               |                |               |
| Cases/Pop | 185/1,197      | 11/103        | 47/358         | 20/200        | 99/438         | 8/98          |
| DSR       | 148.1          | 104.8         | 128.8          | 106.0         | 195.4          | 92.8          |
| (95% CI)  | (127.5, 171.2) | (51.0, 194.8) | (94.6, 171.8)  | (64.4, 165.3) | (158.5, 239.5) | (37.1, 200.9) |
| 2016      |                |               |                |               |                |               |
| Cases/Pop | 206/1,177      | 10/126        | 62/378         | 18/158        | 112/430        | 4/85          |
| DSR       | 169.0          | 62.7          | 164.8          | 123.6         | 231.7          | 61.3          |
| (95% CI)  | (146.7, 193.9) | (30.0, 125.9) | (126.1, 211.9) | (71.9, 203.1) | (189.9, 280.8) | (15.1, 172.8) |
| 2017      |                |               |                |               |                |               |
| Cases/Pop | 230/1,156      | 11/114        | 59/391         | 17/133        | 139/432        | 4/86          |
| DSR       | 190.4          | 99.1          | 146.8          | 133.4         | 281.6          | 54.0          |
| (95% CI)  | (166.4, 217.0) | (49.2, 181.5) | (111.7, 189.9) | (76.8, 218.7) | (235.8, 335.0) | (13.0, 163.1) |

**Appendix 1** to Huang Y, Senger J-LB, Korus L, et al. Geographic variation in breast reconstruction surgery after mastectomy for females with breast cancer in Alberta, Canada. *Can J Surg* 2024. Copyright © 2024 The Author(s) or their employer(s). To receive this resource in an accessible format, please contact us at [cmajgroup@cmaj.ca](mailto:cmajgroup@cmaj.ca).

DOI: 10.1503/cjs003823

*Online appendices are unedited and posted as supplied by the authors.*

Supplementary Table 3: Multivariable regression models for the odds of breast reconstruction at 1 year and the time from mastectomy to breast reconstruction.

| Characteristic                       | Breast Reconstruction at 1 year Post-mastectomy |                | Time from Mastectomy to Breast Reconstruction |                |
|--------------------------------------|-------------------------------------------------|----------------|-----------------------------------------------|----------------|
|                                      | Odds Ratio                                      | (95% CI)       | Hazard Ratio                                  | (95% CI)       |
| <b>Age group at diagnosis</b>        |                                                 |                |                                               |                |
| 21-44                                | 16.70                                           | (13.74, 20.36) | 16.29                                         | (14.23, 18.65) |
| 45-54                                | 9.32                                            | (7.80, 11.16)  | 10.78                                         | (9.47, 12.26)  |
| 55-64                                | 4.22                                            | (3.51, 5.10)   | 4.78                                          | (4.18, 5.48)   |
| ≥65                                  | Reference                                       |                | Reference                                     |                |
| <b>Zone</b>                          |                                                 |                |                                               |                |
| North                                | 0.35                                            | (0.26, 0.49)   | 0.55                                          | (0.46, 0.65)   |
| Edmonton                             | 0.53                                            | (0.47, 0.61)   | 0.69                                          | (0.64, 0.74)   |
| Central                              | 0.49                                            | (0.37, 0.65)   | 0.64                                          | (0.54, 0.75)   |
| Calgary                              | Reference                                       |                | Reference                                     |                |
| South                                | 0.56                                            | (0.41, 0.79)   | 0.67                                          | (0.55, 0.82)   |
| <b>Neighbourhood income quintile</b> |                                                 |                |                                               |                |
| Q1 lowest                            | 0.59                                            | (0.49, 0.70)   | 0.64                                          | (0.57, 0.71)   |
| Q2                                   | 0.66                                            | (0.56, 0.78)   | 0.76                                          | (0.69, 0.83)   |
| Q3                                   | 0.78                                            | (0.67, 0.91)   | 0.85                                          | (0.78, 0.94)   |
| Q4                                   | 0.81                                            | (0.69, 0.94)   | 0.97                                          | (0.89, 1.06)   |
| Q5 highest                           | Reference                                       |                | Reference                                     |                |
| <b>Community size</b>                |                                                 |                |                                               |                |
| <10,000                              | 1.01                                            | (0.78, 1.30)   | 1.02                                          | (0.88, 1.19)   |

**Appendix 1** to Huang Y, Senger J-LB, Korus L, et al. Geographic variation in breast reconstruction surgery after mastectomy for females with breast cancer in Alberta, Canada. *Can J Surg* 2024. Copyright © 2024 The Author(s) or their employer(s).  
 To receive this resource in an accessible format, please contact us at [cmajgroup@cmaj.ca](mailto:cmajgroup@cmaj.ca).

DOI: 10.1503/cjs003823

*Online appendices are unedited and posted as supplied by the authors.*

|                                    |               |           |              |           |              |
|------------------------------------|---------------|-----------|--------------|-----------|--------------|
|                                    | 10,000-99,999 | 1.03      | (0.77, 1.38) | 1.06      | (0.89, 1.25) |
|                                    | ≥100,000      | Reference |              | Reference |              |
| ≥ 1 Comorbidity                    |               |           |              |           |              |
|                                    | No            | Reference |              | Reference |              |
|                                    | Yes           | 0.80      | (0.66, 0.95) | 0.75      | (0.67, 0.84) |
| Stage                              |               |           |              |           |              |
|                                    | 0             | Reference |              | Reference |              |
|                                    | I             | 0.41      | (0.36, 0.48) | 0.61      | (0.55, 0.67) |
|                                    | II            | 0.18      | (0.15, 0.22) | 0.41      | (0.36, 0.46) |
|                                    | III           | 0.08      | (0.06, 0.10) | 0.28      | (0.24, 0.33) |
|                                    | IV            | 0.09      | (0.05, 0.16) | 0.19      | (0.13, 0.28) |
|                                    | Unknown       | 0.42      | (0.29, 0.59) | 0.59      | (0.46, 0.75) |
| Chemotherapy before mastectomy     |               |           |              |           |              |
|                                    | No            | Reference |              | Reference |              |
|                                    | Yes           | 0.91      | (0.73, 1.14) | 1.07      | (0.94, 1.21) |
| Chemotherapy after mastectomy      |               |           |              |           |              |
|                                    | No            | Reference |              | Reference |              |
|                                    | Yes           | 0.55      | (0.47, 0.65) | 1.02      | (0.94, 1.12) |
| Radiation therapy after mastectomy |               |           |              |           |              |
|                                    | No            | Reference |              | Reference |              |
|                                    | Yes           | 0.59      | (0.39, 0.87) | 0.80      | (0.66, 0.95) |
| Year of diagnosis                  |               |           |              |           |              |
|                                    | 2004          | Reference |              | Reference |              |
|                                    | 2005          | 0.92      | (0.69, 1.21) | 1.11      | (0.93, 1.31) |
|                                    | 2006          | 0.67      | (0.50, 0.89) | 0.99      | (0.84, 1.18) |
|                                    | 2007          | 0.67      | (0.50, 0.89) | 1.09      | (0.92, 1.28) |
|                                    | 2008          | 0.54      | (0.40, 0.73) | 1.18      | (1.00, 1.39) |
|                                    | 2009          | 0.43      | (0.32, 0.59) | 1.07      | (0.91, 1.25) |
|                                    | 2010          | 0.53      | (0.40, 0.71) | 1.24      | (1.06, 1.45) |
|                                    | 2011          | 0.42      | (0.31, 0.57) | 1.03      | (0.87, 1.22) |
|                                    | 2012          | 0.88      | (0.67, 1.16) | 1.34      | (1.13, 1.57) |
|                                    | 2013          | 1.06      | (0.81, 1.38) | 1.44      | (1.22, 1.69) |
|                                    | 2014          | 1.35      | (1.05, 1.73) | 1.58      | (1.35, 1.85) |
|                                    | 2015          | 1.21      | (0.93, 1.56) | 1.46      | (1.24, 1.72) |
|                                    | 2016          | 1.59      | (1.24, 2.05) | 1.76      | (1.49, 2.08) |
|                                    | 2017          | 1.62      | (1.24, 2.11) | 2.08      | (1.73, 2.51) |

**Appendix 1** to Huang Y, Senger J-LB, Korus L, et al. Geographic variation in breast reconstruction surgery after mastectomy for females with breast cancer in Alberta, Canada. *Can J Surg* 2024. Copyright © 2024 The Author(s) or their employer(s).  
To receive this resource in an accessible format, please contact us at [cmajgroup@cmaj.ca](mailto:cmajgroup@cmaj.ca).

DOI: 10.1503/cjs003823

*Online appendices are unedited and posted as supplied by the authors.*

Supplementary Figure 1: Alberta's 70 sRHA's and five zones (from top to bottom: North, Edmonton, Central, Calgary, and South).

**Appendix 1** to Huang Y, Senger J-LB, Korus L, et al. Geographic variation in breast reconstruction surgery after mastectomy for females with breast cancer in Alberta, Canada. *Can J Surg* 2024. Copyright © 2024 The Author(s) or their employer(s). To receive this resource in an accessible format, please contact us at [cmajgroup@cmaj.ca](mailto:cmajgroup@cmaj.ca).

DOI: 10.1503/cjs003823

*Online appendices are unedited and posted as supplied by the authors.*

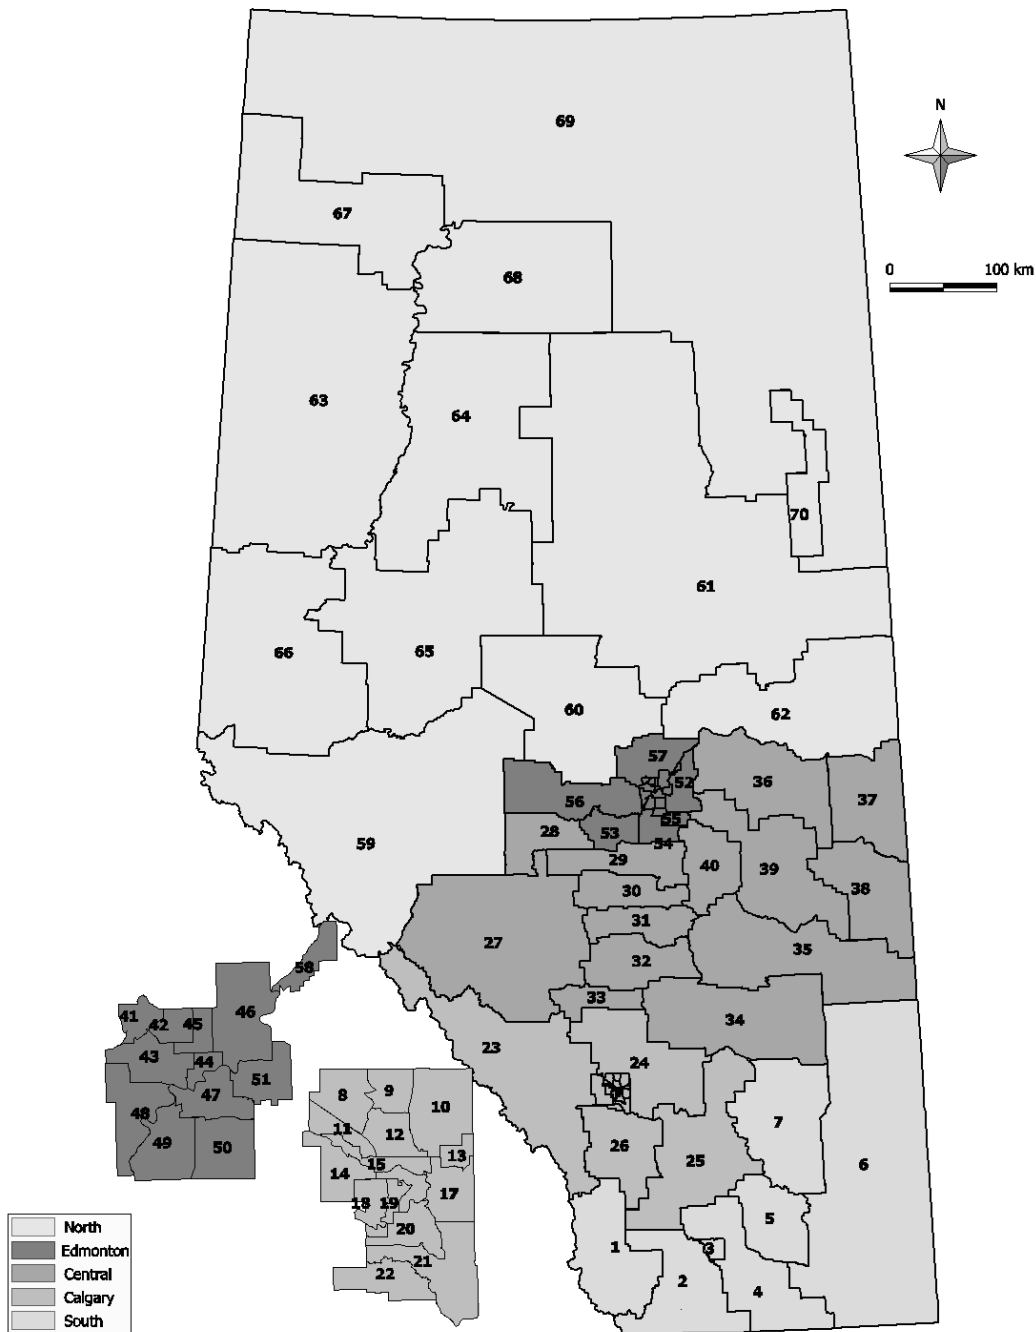

**Appendix 1** to Huang Y, Senger J-LB, Korus L, et al. Geographic variation in breast reconstruction surgery after mastectomy for females with breast cancer in Alberta, Canada. *Can J Surg* 2024. Copyright © 2024 The Author(s) or their employer(s). To receive this resource in an accessible format, please contact us at [cmajgroup@cmaj.ca](mailto:cmajgroup@cmaj.ca).

DOI: 10.1503/cjs003823

*Online appendices are unedited and posted as supplied by the authors.*



**Appendix 1** to Huang Y, Senger J-LB, Korus L, et al. Geographic variation in breast reconstruction surgery after mastectomy for females with breast cancer in Alberta, Canada. *Can J Surg* 2024. Copyright © 2024 The Author(s) or their employer(s). To receive this resource in an accessible format, please contact us at [cmajgroup@cmaj.ca](mailto:cmajgroup@cmaj.ca).

DOI: 10.1503/cjs003823

*Online appendices are unedited and posted as supplied by the authors.*

Supplementary Figure 2: Time to breast cancer reconstruction by cluster.

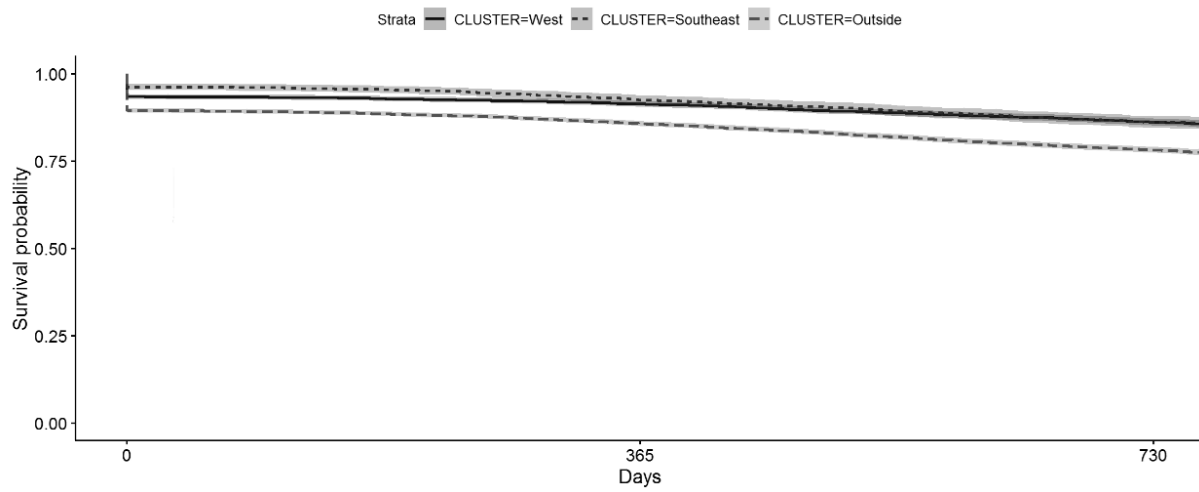

Supplement: CJS-003823-at-1.pdf [file CJS-003823-at-1.pdf]
